# Supplementary material for: Altered PPARγ Expression Promotes Myelin-Induced Foam Cell Formation in Macrophages in Multiple Sclerosis
Source: PubMed Central journal article supplement (PMC7731422; doi:10.3390/ijms21239329), 2020-12-07
Supplement: ijms-21-09329-s001.pdf [file ijms-21-09329-s001.pdf]

## Altered PPAR $\gamma$ Expression Promotes Myelin-Induced Foam Cell Formation in Macrophages in Multiple Sclerosis

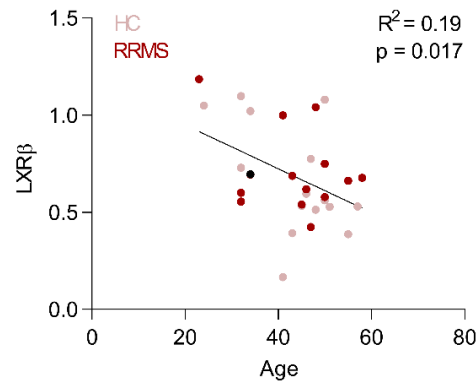

**Figure S1.** Negative correlation for *LXRβ* and age. The regression line describing the relationship between *LXRβ* and age in healthy controls and RR-MS patients ( $n = 30$  total;  $n = 15$  healthy controls and RR-MS patients) is shown.

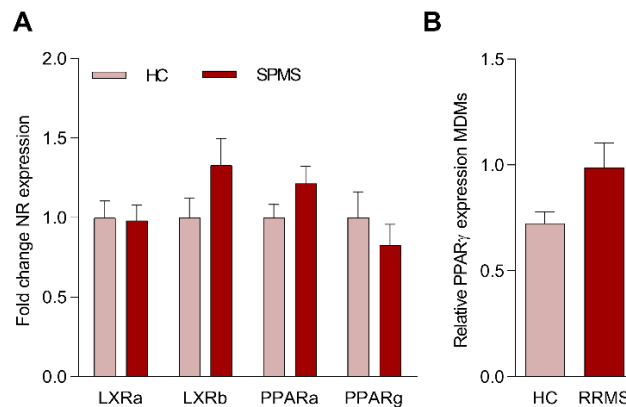

**Figure S2.** Nuclear receptor expression in monocytes of SP-MS patients and in vitro differentiated monocyte-derived macrophages. **(A)** Basal mRNA expression of *LXR*- and *PPAR*-isoforms in monocytes from age- and gender-matched healthy controls and secondary-progressive MS patients (SP-MS) ( $n = 9$ ). **(B)** mRNA expression of *PPARγ* in macrophages differentiated from monocytes isolated from healthy controls and relapsing-remitting MS patients (RR-MS) ( $n = 11$ /group). Values represent the mean  $\pm$  S.E.M. Statistical significance was assessed using one-way ANOVA with Dunn's multiple comparison correction **(A)** and unpaired student *T*-test **(B)**.  $n$  represents the total number of donors included in the experiment.

**Table S1.** Descriptive statistics for the study population.

|                          | HC vs. RR-MS   |                   | HC vs. SP-MS  |                  |
|--------------------------|----------------|-------------------|---------------|------------------|
|                          | HC<br>(N = 15) | RR-MS<br>(N = 15) | HC<br>(N = 7) | SP-MS<br>(N = 7) |
| Age <sup>a</sup> (years) | 43.67 ± 9.4    | 43.67 ± 9.7       | 54.29 ± 7.34  | 54.43 ± 6.8      |
| Male gender, (%)         | 3 (20%)        | 3 (20%)           | 3 (43%)       | 3 (43%)          |
| EDSS <sup>a</sup>        |                | 2.77 ± 1.9        |               | 5.58 ± 1.69      |
| Therapy (n)              |                |                   |               |                  |
| No treatment             |                | 3                 |               | 2                |
| Natalizumab              |                | 4                 |               | 1                |
| Interferon-beta          |                | 6                 |               | 1                |
| Cyclophosphamide         |                | 1                 |               | 1                |
| Glatiramer acetate       |                | 1                 |               |                  |
| Metotrexate              |                |                   |               | 2                |

<sup>a</sup> Mean ± Standard Deviation. HC: healthy control, RR-MS: relapsing-remitting multiple sclerosis, SP-MS: secondary progressive multiple sclerosis, EDSS: expanded disability status scale.

**Table S2.** List of primer sequences used for RT-qPCR.

| Gene            | Forward Primer                  | Reverse Primer                 |
|-----------------|---------------------------------|--------------------------------|
| h-ABCA1         | AAC-GAG-ACT-AAC-GAG-GCA-ATC     | ACA-CAA-TAC-CAG-CCC-AGA-AC     |
| h-ABCG1         | CCA-GAA-GTC-GGA-GGC-CAT-C       | AAG-TCC-AGG-TAC-AGC-TTG-GCA    |
| h-CD36          | GCA-GCT-GCA-TCC-CAT-ATC-TA      | GGG-TAC-GGA-ACC-AAA-CTC-AA     |
| h-CypA          | AGA-CTG-AGT-GGT-TGG-ATG-GC      | TCG-AGT-TGT-CCA-CAG-TCA-GC     |
| h-IL6           | GAG-GAG-ACT-TGC-CTG-GTG-AA      | GCT-CTG-GCT-TGT-TCC-TCA-CT     |
| h-LXR $\alpha$  | CTT-GCT-CAT-TGC-TAT-CAG-CAT-CTT | ACA-TAT-GTG-TGC-TGC-AGC-CTC-T  |
| h-LXR $\beta$   | CAC-GAG-ACA-GAG-TGT-ATC-ACC-TTC | AGA-TGT-TGA-TGG-CGA-TGA-GCA-G  |
| h-PLIN2         | TGT-GAG-ATG-GCA-GAG-AAC-GGT     | CTG-CTC-ACG-AGC-TGC-ATC-ATC    |
| h-PPAR $\alpha$ | GTG-GCT-GCT-ATC-ATT-TGC-TGT-G   | CAC-ATG-TAA-ATA-CCC-TCC-TGC-AT |
| h-PPAR $\gamma$ | GAT-GTC-TCA-TAA-TGC-CAT-CAG-GTT | GGA-TTC-AGC-TGG-TCG-ATA-TCA-CT |
| h-RPL13A        | AAG-TTG-AAG-TAC-CTG-GCT-TTC-C   | GCC-GTC-AAA-CAC-CIT-GAG-AC     |
| h-RXR $\alpha$  | CCC-TGT-CAC-CAA-CAT-TTG-CC      | AGA-AGT-GTG-GGA-TCC-GCT-TG     |
| h-RXR $\beta$   | GAA-GCT-CAG-GCA-AAC-ACT-AC      | TGC-AGT-CIT-TGT-TGT-CCC        |
| h-SCD1          | GTA-CCG-CTG-GCA-CAT-CAA-CTT     | TTG-GAG-ACT-TTC-TTC-CGG-TCA-T  |
| h-SRA1          | TCC-TCG-TGT-TTG-CAG-TTC-TC      | GCA-ATT-CIT-CGT-TTC-CCA-CT     |
| h-TBP           | TAT-AAT-CCC-AAG-CGG-TTT-GC      | GCT-GGA-AAA-CCC-AAC-TTC-TG     |
| h-TNF $\alpha$  | AGC-CCA-TGT-TGT-AGC-AAA-CC      | TGA-GGT-ACA-GGC-CCT-CTG-AT     |
| h-YWHAZ         | CTT-GAC-ATT-GTG-GAC-ATC-GG      | TAT-TTG-TGG-GAC-AGC-ATG-GA     |
| h-ABCA1         | AAC-GAG-ACT-AAC-GAG-GCA-ATC     | ACA-CAA-TAC-CAG-CCC-AGA-AC     |
| h-ABCG1         | CCA-GAA-GTC-GGA-GGC-CAT-C       | AAG-TCC-AGG-TAC-AGC-TTG-GCA    |
